# Supplementary material for: A cluster-of-functional-groups approach for studying organic enhanced atmospheric cluster formation
Source: Copernicus journal article supplement (doi:10.5194/ar-2024-6), 2024-02-22
Supplement: Supplementary file 1 [file ar-2024-6-supplement.pdf]

# Supporting Information: A Cluster-of-Functional-Groups Approach for Studying Organic Enhanced Atmospheric Cluster Formation

Astrid Nørskov Pedersen, Yosef Knattrup, and Jonas Elm

Department of Chemistry, Aarhus University, Langelandsgade 140, 8000 Aarhus C, Denmark

**Correspondence:** Jonas Elm (jelm@chem.au.dk)

## S1 Cluster Structures

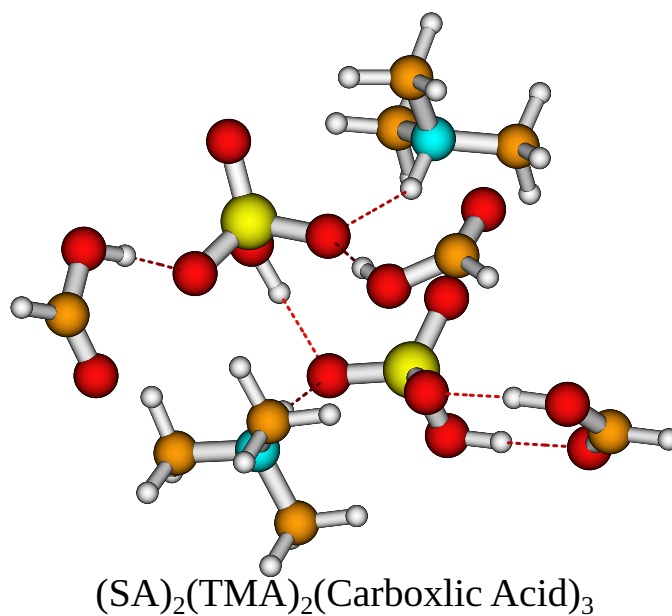

**Figure S1.** The  $(SA)_2(TMA)_2(\text{Carboxylic Acid})_3$  cluster geometry lowest in free energy. Calculated at the DLPNO-CCSD( $T_0$ )/aug-cc-pVTZ// $\omega$ B97X-D/6-31++G(d,p) level of theory with quasi-harmonic cutoff of  $100\text{ cm}^{-1}$ , at 298.15 K and 1 atm. White = hydrogen, brown = carbon, red = oxygen, yellow = sulfur, blue = nitrogen.

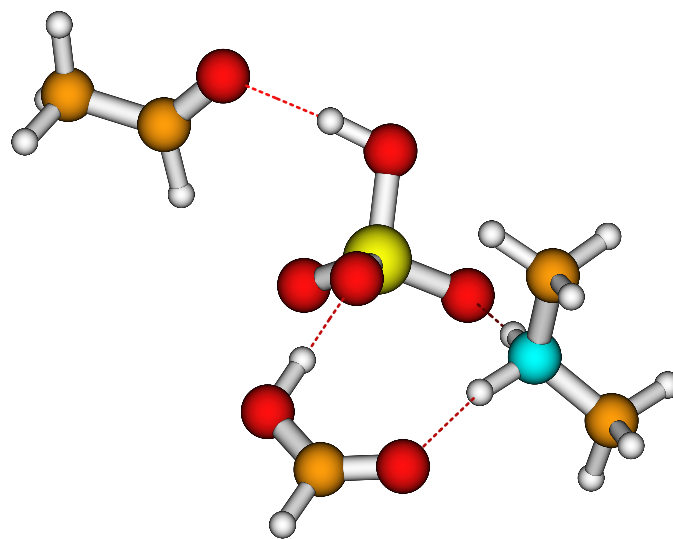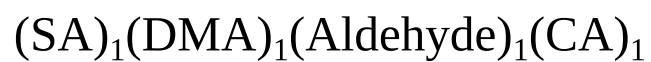

**Figure S2.** The  $(\text{SA})_1(\text{DMA})_1(\text{Aldehyde})_1(\text{Carboxylic Acid})_1$  cluster geometry second lowest in free energy (+0.62 kcal/mol). Calculated at the DLPNO-CCSD( $T_0$ )/aug-cc-pVTZ// $\omega$ B97X-D/6-31++G(d,p) level of theory with quasi-harmonic cutoff of  $100 \text{ cm}^{-1}$ , at 298.15 K and 1 atm. White = hydrogen, brown = carbon, red = oxygen, yellow = sulfur, blue = nitrogen.

## S2 Fluxes

**Table S1.** Sum of outgrowing channels that contribute over 2 % to the total flux and contain OOM. The SA concentration was fixed at  $10^6 \text{ cm}^{-3}$ .

| System     | $C_{\text{OOM}}(\text{ppt})$ | $C_{\text{base}}(\text{ppt})$ | Outgrowing (%) |
|------------|------------------------------|-------------------------------|----------------|
| SA-AM-OOM  | 1                            | 10                            | 97.96          |
|            | 1                            | 10000                         | 97.95          |
|            | 10                           | 10                            | 99.80          |
|            | 10                           | 10000                         | 99.81          |
| SA-MA-OOM  | 1                            | 1                             | 98.86          |
|            | 1                            | 100                           | 99.05          |
|            | 10                           | 1                             | 99.72          |
|            | 10                           | 100                           | 99.74          |
| SA-DMA-OOM | 1                            | 1                             | 72.44          |
|            | 1                            | 10                            | 83.77          |
|            | 10                           | 1                             | 99.03          |
|            | 10                           | 10                            | 99.67          |
| SA-TMA-OOM | 1                            | 1                             | 7.52           |
|            | 1                            | 10                            | 12.39          |
|            | 10                           | 1                             | 78.97          |
|            | 10                           | 10                            | 87.22          |
